# Supplementary material
Source: Springer Nature journal article supplement (https://www.springermedizin.de/resource/supplementary/13046_2009_113_MOESM7_ESM.pdf/9661658)

marker  
UTOS-1  
Saos-2

ALP

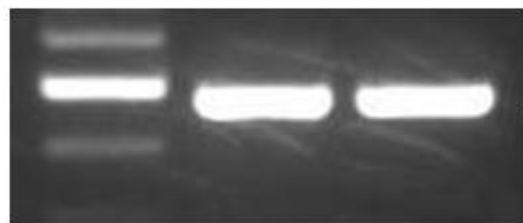

← 475 bp

OP

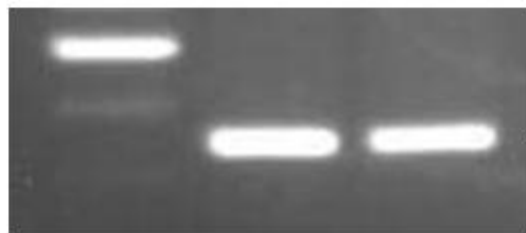

← 347 bp

OC

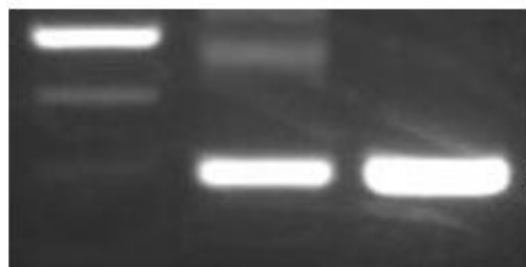

← 294 bp

GAPDH

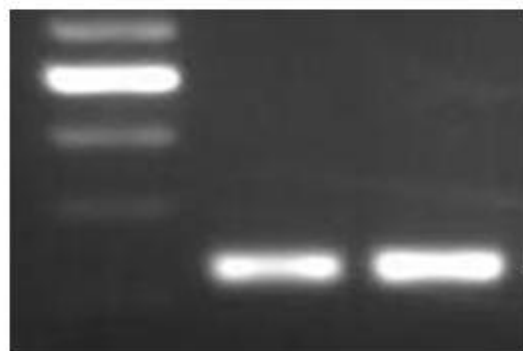

← 226 bp

Supplement: MOESM7 [file 9661658]
